# Supplementary material
Source: publisher figshare collection journal article supplement (https://acs.figshare.com/ndownloader/files/14446088)
Supplement: Supplementary file 1 [file 14446088]

# Supporting Information

## **Fabrication of SnS<sub>2</sub>/Mn<sub>2</sub>SnS<sub>4</sub>/Carbon Heterostructures for Sodium-Ion Batteries with High Initial Coulombic Efficiency and Cycling Stability**

Xing Ou,<sup>a,§</sup> Liang Cao,<sup>a,§</sup> Xinghui Liang,<sup>a</sup> Fenghua Zheng,<sup>a</sup> Hong-Sheng Zheng,<sup>b</sup>  
Xianfeng Yang,<sup>c</sup> Jeng-Han Wang,<sup>b</sup> Chenghao Yang,<sup>a,\*</sup> Meilin Liu<sup>a,d</sup>

<sup>a</sup> *Guangzhou Key Laboratory for Surface Chemistry of Energy Materials, New Energy Research Institute, School of Environment and Energy, South China University of Technology, Guangzhou 510006, P. R. China*

<sup>b</sup> *Department of Chemistry, National Taiwan Normal University, Taipei, 11677, Taiwan*

<sup>c</sup> *Analytical and Testing Center, South China University of Technology, Guangzhou, 510641 P. R. China*

<sup>d</sup> *School of Materials Science & Engineering, Georgia Institute of Technology, Atlanta, GA30332-0245, USA*

\* Corresponding author. E-mail: esyangc@scut.edu.cn (C. Yang).

§ These authors contributed equally.

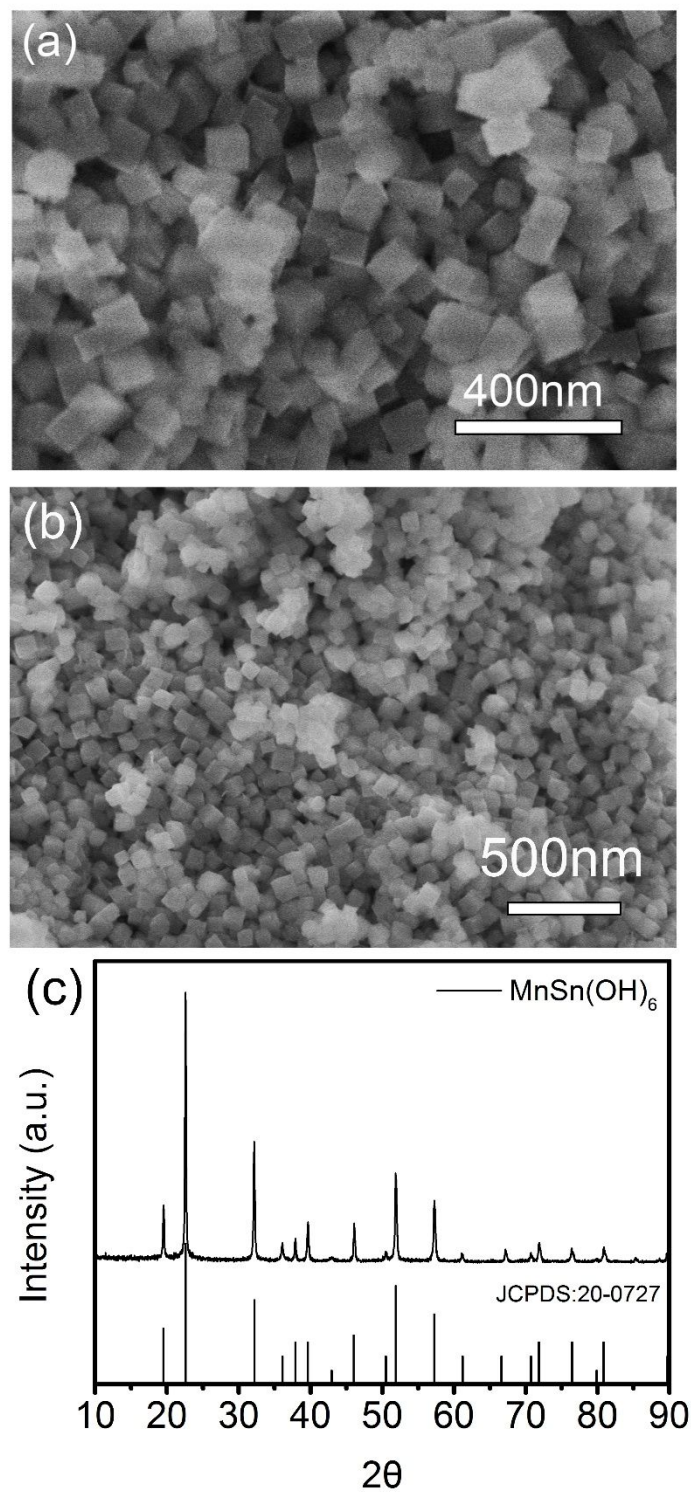

Figure S1. (a,b) SEM image and (c) XRD pattern of  $\text{MnSn}(\text{OH})_6$  precursors.

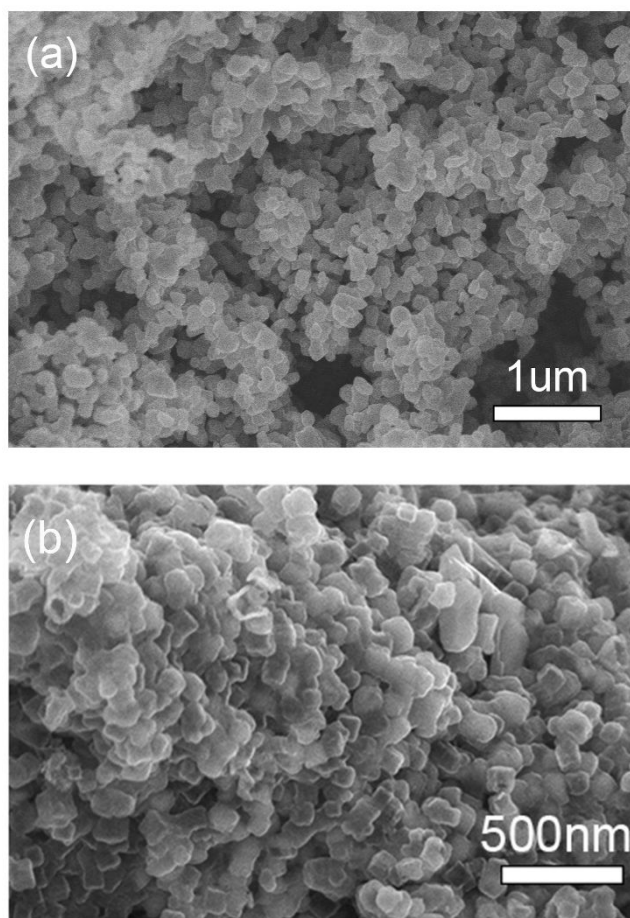

Figure S2. (a,b) SEM images of SMS nanoboxes.

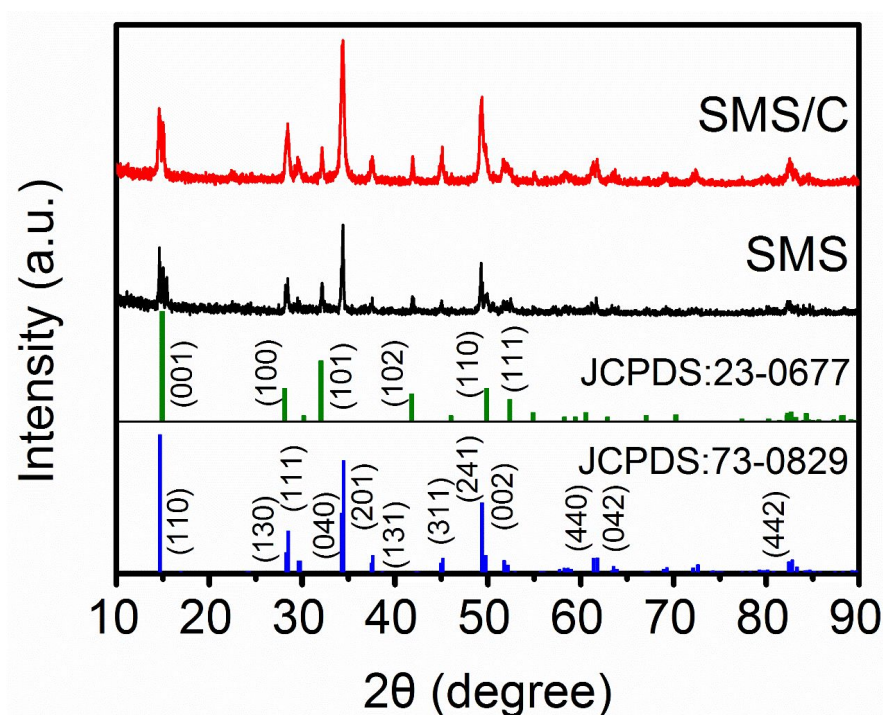

Figure S3. XRD patterns of SMS and SMS/C.

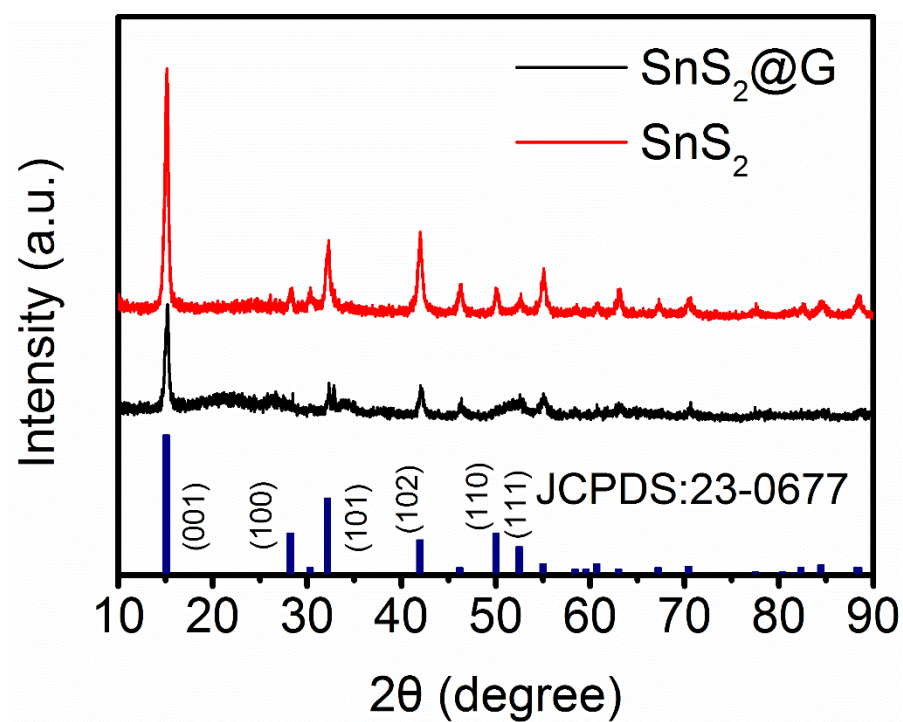

Figure S4. XRD patterns of  $\text{SnS}_2$  and  $\text{SnS}_2\text{/C}$ .



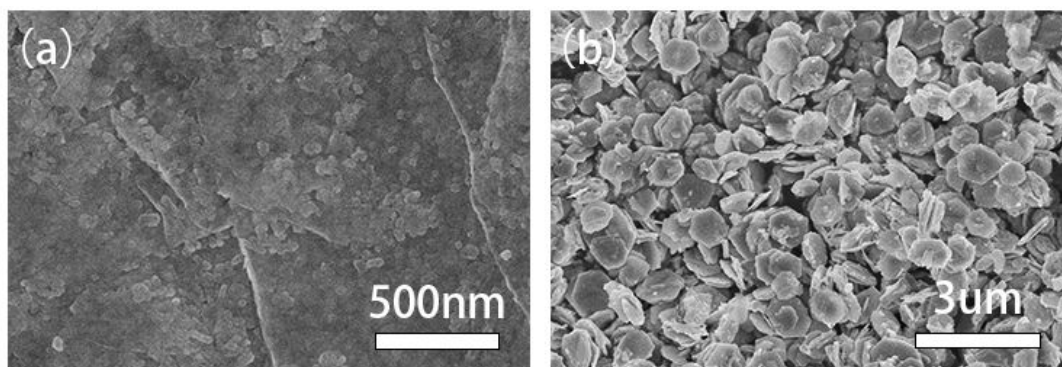

Figure S5. SEM images of (a)  $\text{SnS}_2/\text{C}$  and (b)  $\text{SnS}_2$ .

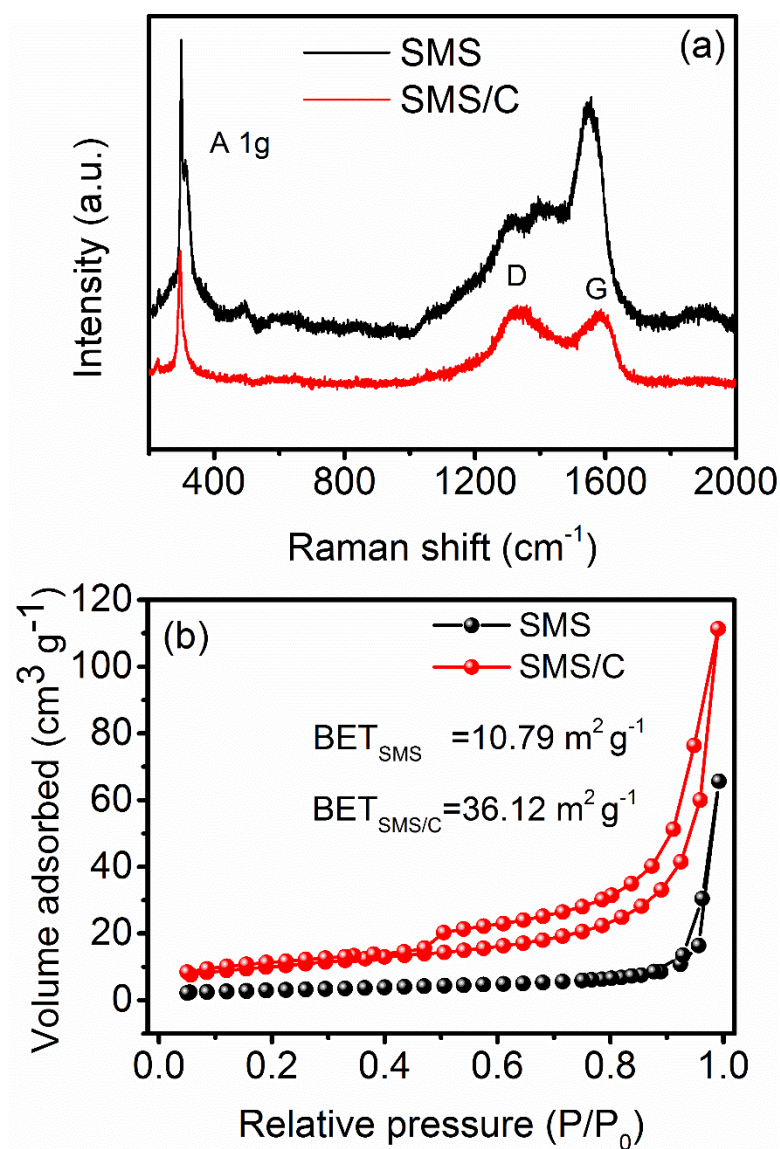

Figure S6. (a) Raman spectra and (b) BET results of SMS and SMS/C.

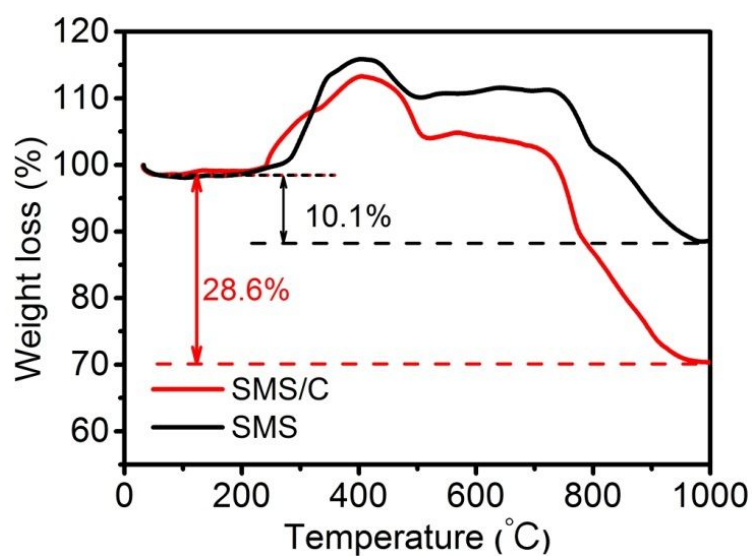

Figure S7. TGA results of SMS and SMS/C composites.

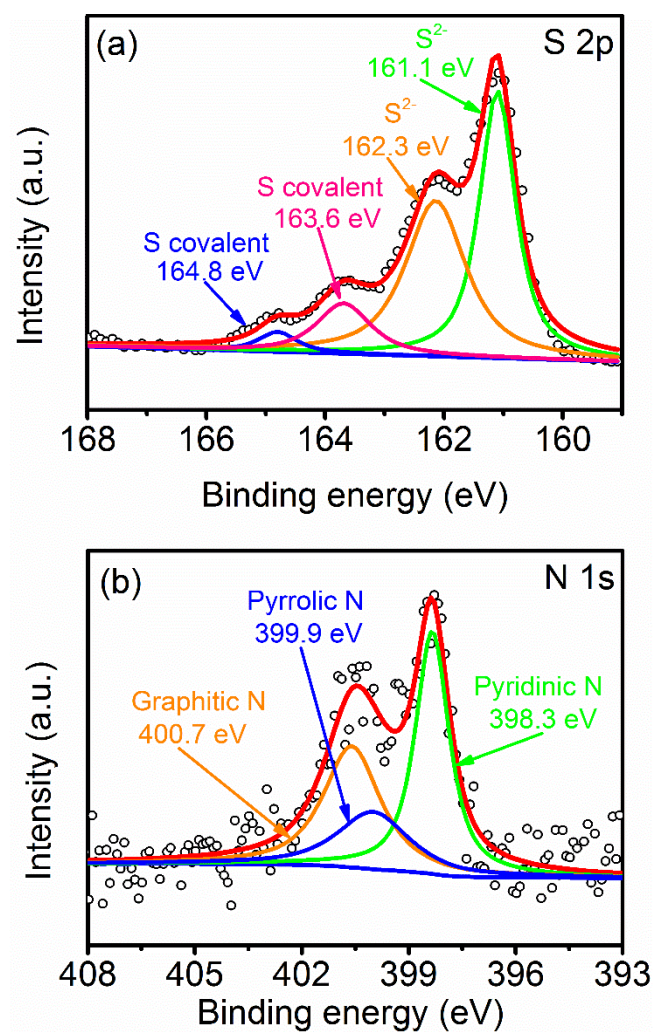

Figure S8. The XPS results of (a) S 2p and (b) N 1s spectrum of SMS/C.

**Table S1.** The comparison of ICEs and cycling performance among the Sn-based sulfide materials for SIBs anodes.

| Sample                                  | Cycle number | Current density (mA g <sup>-1</sup> ) | Capacity retention (%) | Initial coulombic efficiency (%) | reference |
|-----------------------------------------|--------------|---------------------------------------|------------------------|----------------------------------|-----------|
| SnS <sub>2</sub> @Aerogel               | 100          | 50                                    | 68                     | 53.4                             | S1        |
| graphene                                |              |                                       |                        |                                  |           |
| SnS <sub>2</sub> - rGO                  | 1000         | 800                                   | 62.5                   | 64                               | S2        |
| SnS <sub>2</sub> @N- rGO                | 200          | 500                                   | 86.7                   | 66.5                             | S3        |
| SnS <sub>2</sub> @ rGO                  | 100          | 200                                   | 81                     | 81                               | S4        |
| C@SnS <sub>2</sub> @C                   | 1000         | 5000                                  | 90.2                   | 56                               | S5        |
| MoS <sub>2</sub> /SnS <sub>2</sub> @rGO | 200          | 750                                   | 87.2                   | 84.2                             | S6        |
| SnS <sub>2</sub> nanosheet              | 300          | 1000                                  | 89.2                   | 72                               | S7        |
| SnS <sub>2</sub> @ hollow C             | 100          | 200                                   | 87.6                   | 74.3                             | S8        |
| SnS <sub>2</sub> @CoS <sub>2</sub> -rGO | 100          | 200                                   | 76                     | 86                               | S9        |
| SnS <sub>2</sub> nanowall               | 100          | 500                                   | 85                     | 75.2                             | S10       |
| SMS/C                                   | 500          | 5000                                  | 91.3                   | 90.8                             | This work |

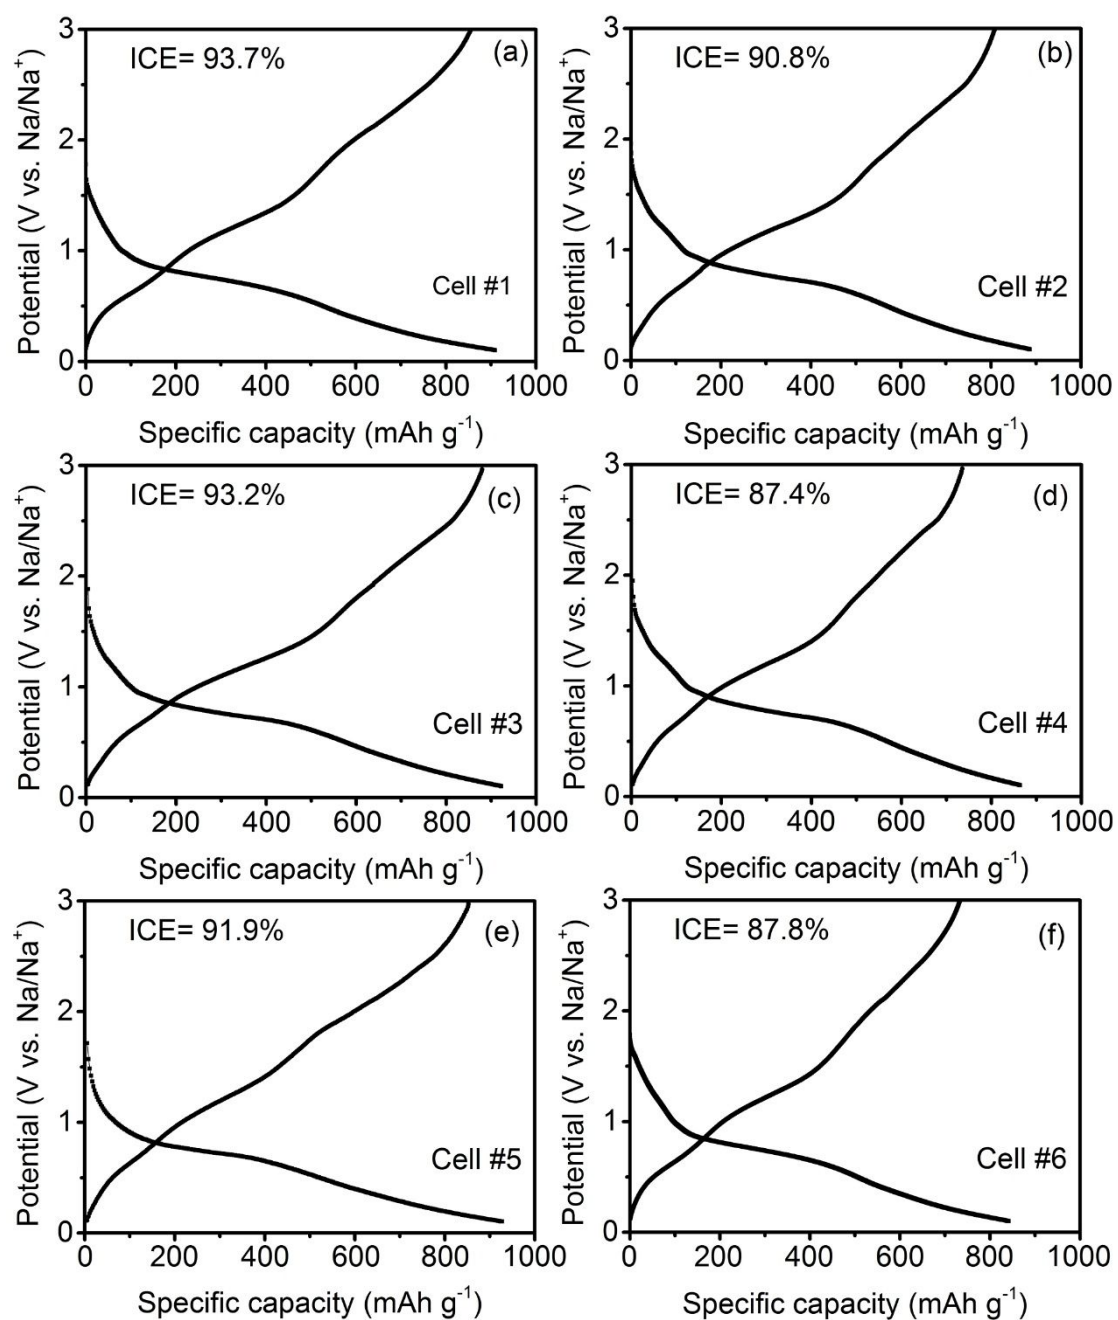

Figure S9. ICE of SMS/C electrodes with six different batteries.



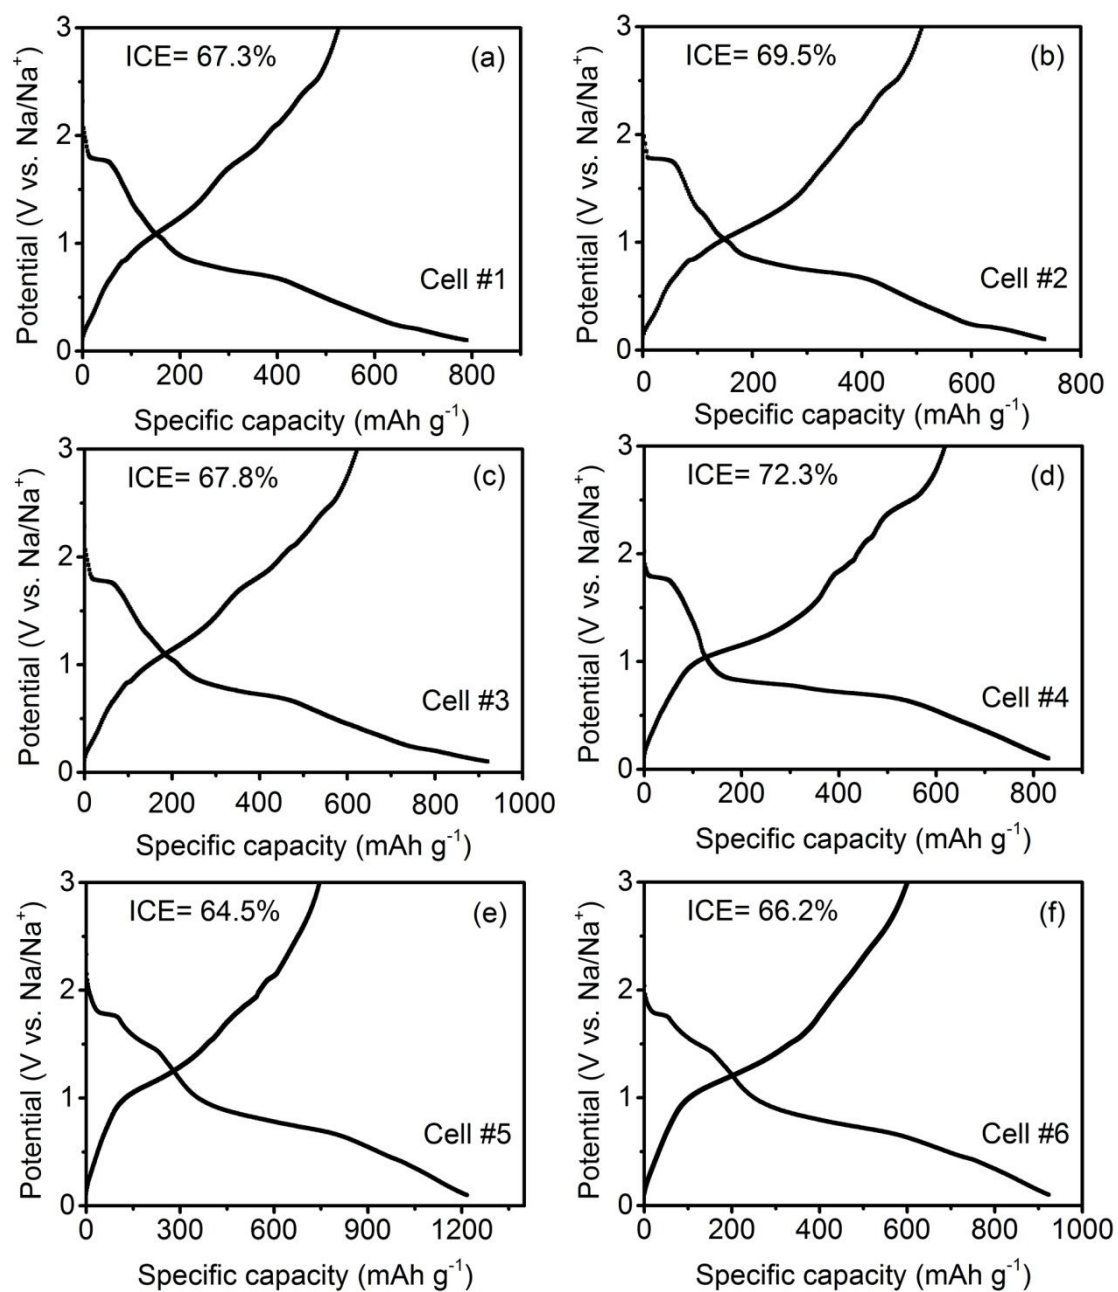

Figure S10. ICE of SnS<sub>2</sub> electrodes with six different batteries.

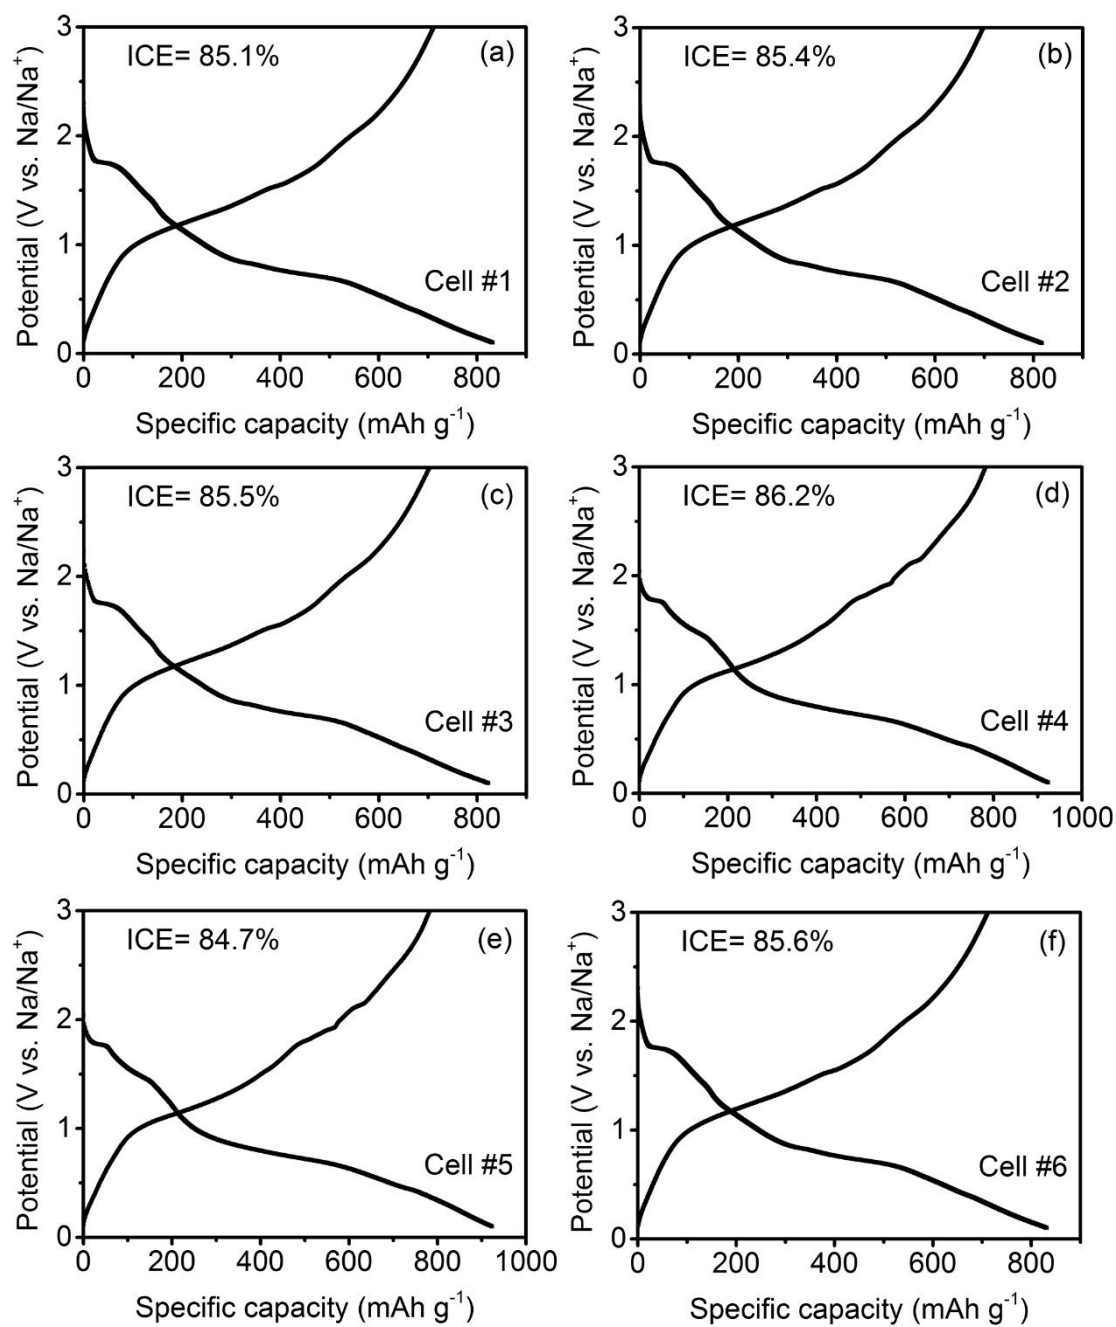

Figure S11. ICE of SnS<sub>2</sub>/C electrodes with six different batteries.

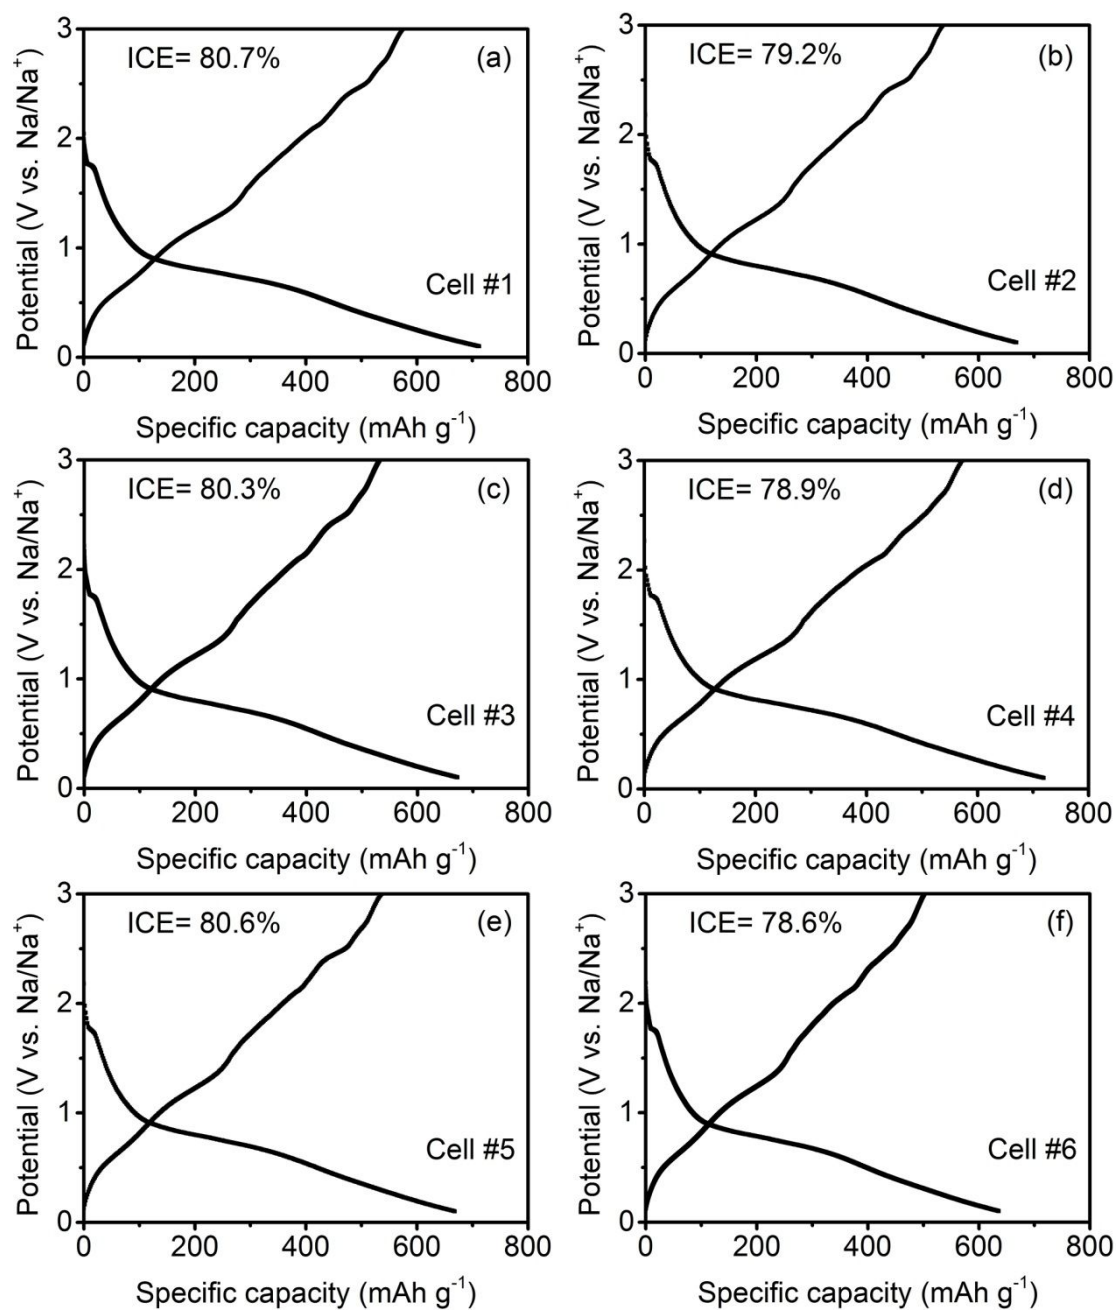

Figure S12. ICE of SMS electrodes with six different batteries.

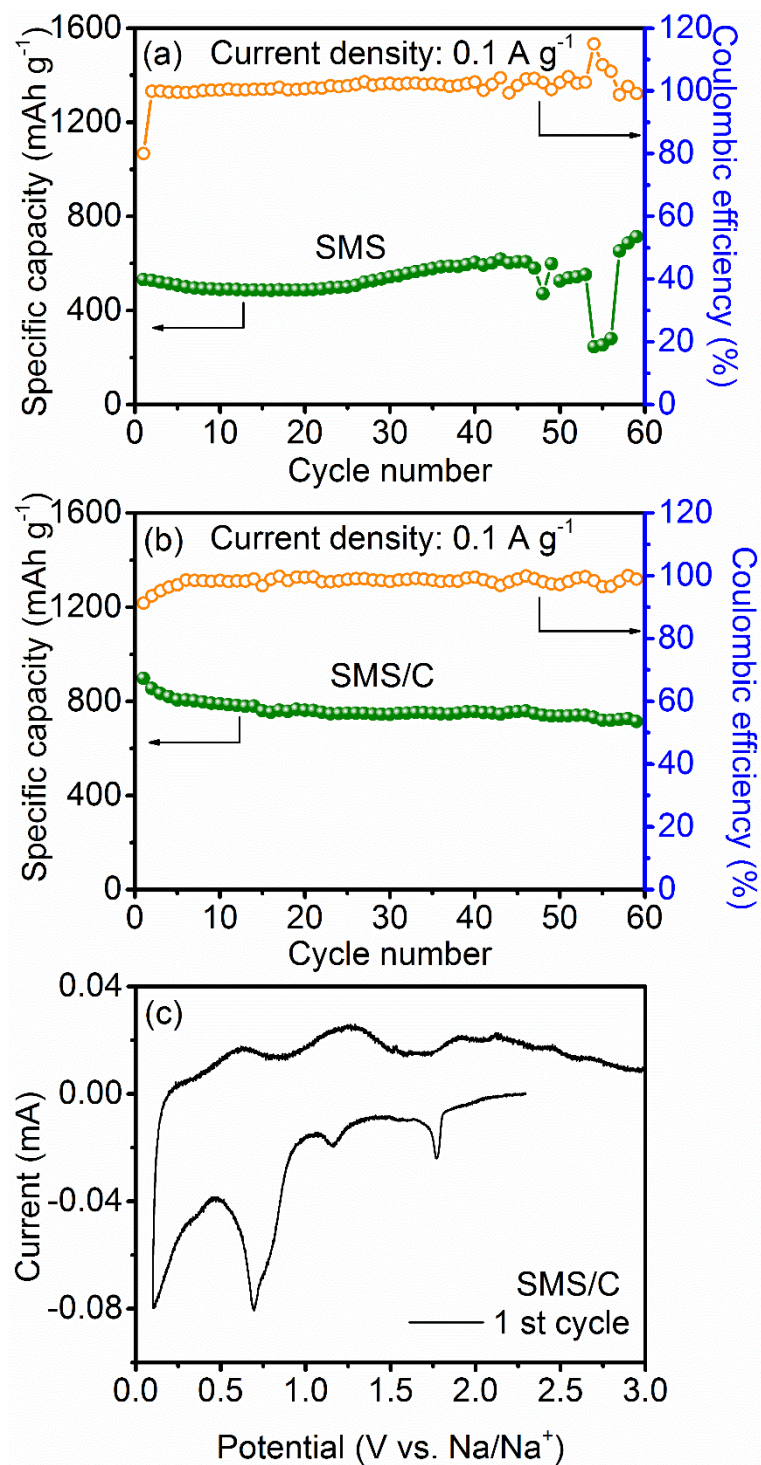

Figure S13. The cycling performance of (a) SMS and (b) SMS/C electrodes at  $0.1 \text{ A g}^{-1}$ . (c) CV curve at initial cycle for SMS/C electrode

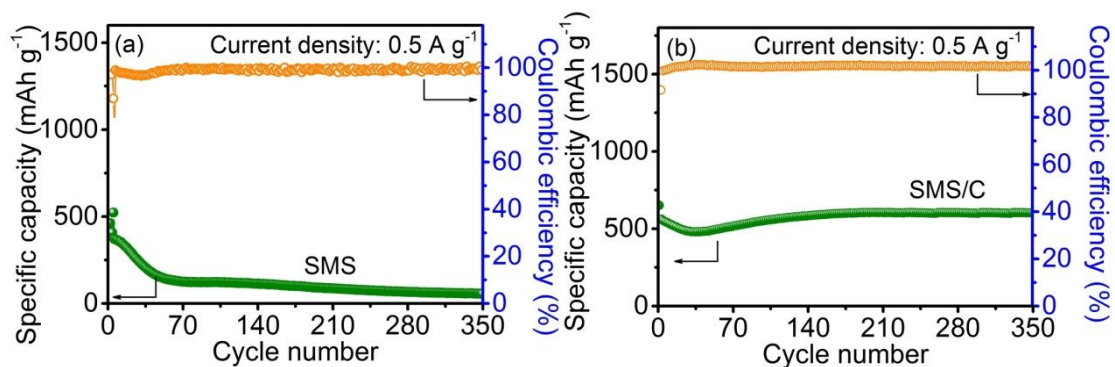

Figure S14. The cycling performance of (a) SMS and (b) SMS/C electrodes at  $0.5 \text{ A g}^{-1}$ .

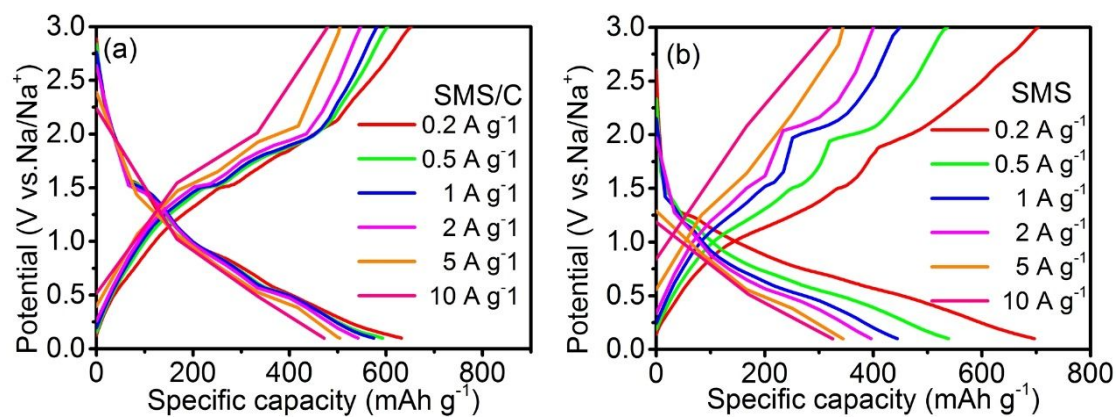

Figure S15. The charge-discharge curves of (a) SMS/C and (b) SMS electrodes at different current density.



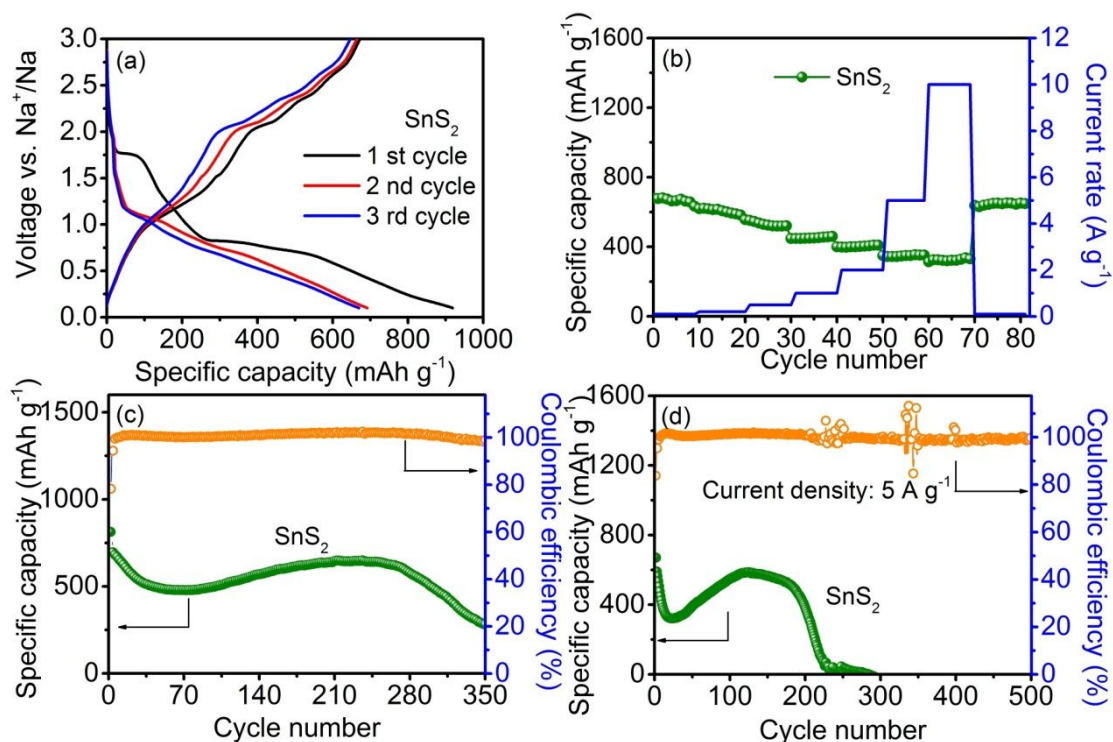

Figure S16. Electrochemical performance of  $\text{SnS}_2$  electrodes: (a) First three cycle charge-discharge curves, (b) rate performance, cycling performance at rate of (c)  $0.5 \text{ A g}^{-1}$  and (d)  $5 \text{ A g}^{-1}$ .

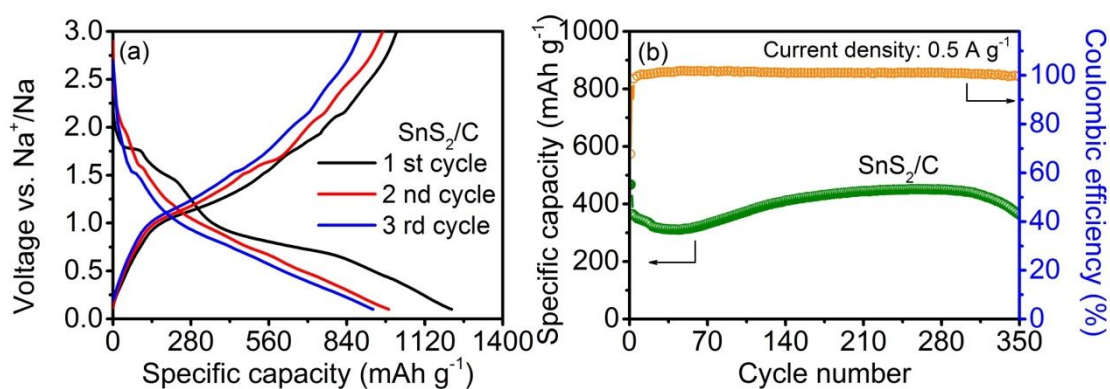

Figure S17. (a) First three charge-discharge curves of  $\text{SnS}_2/\text{C}$  electrode. (b) Cycling performance of  $\text{SnS}_2/\text{C}$  electrode at  $0.5 \text{ A g}^{-1}$ .

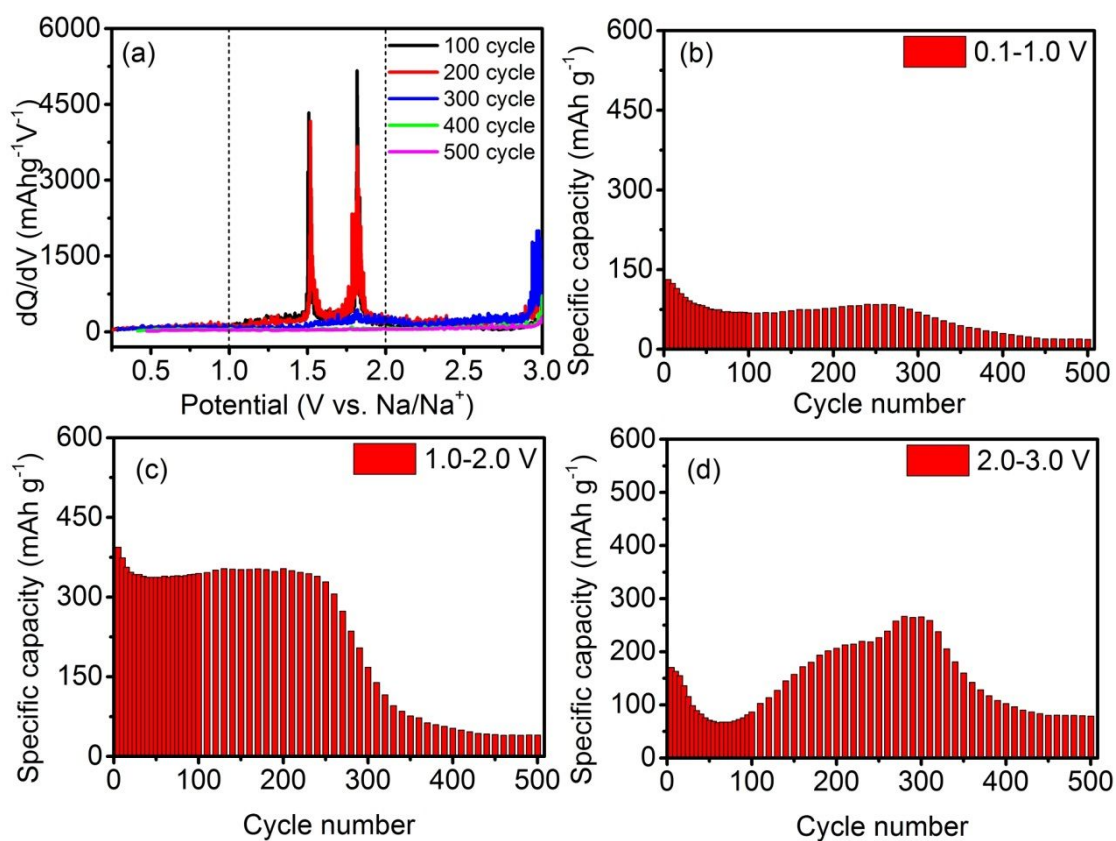

Figure S18. (a) The differential charge capacity curves *versus* voltage at the various cycles for the  $\text{SnS}_2/\text{C}$  composite in 0.1-3.0 V at rate of  $0.5 \text{ A g}^{-1}$ . Reversible capacities versus cycle number of  $\text{SnS}_2/\text{C}$  composite separated into potential ranges of (b) 0.1-1.0 V, (c) 1.0-2.0 V, and (d) 2.0-3.0 V.

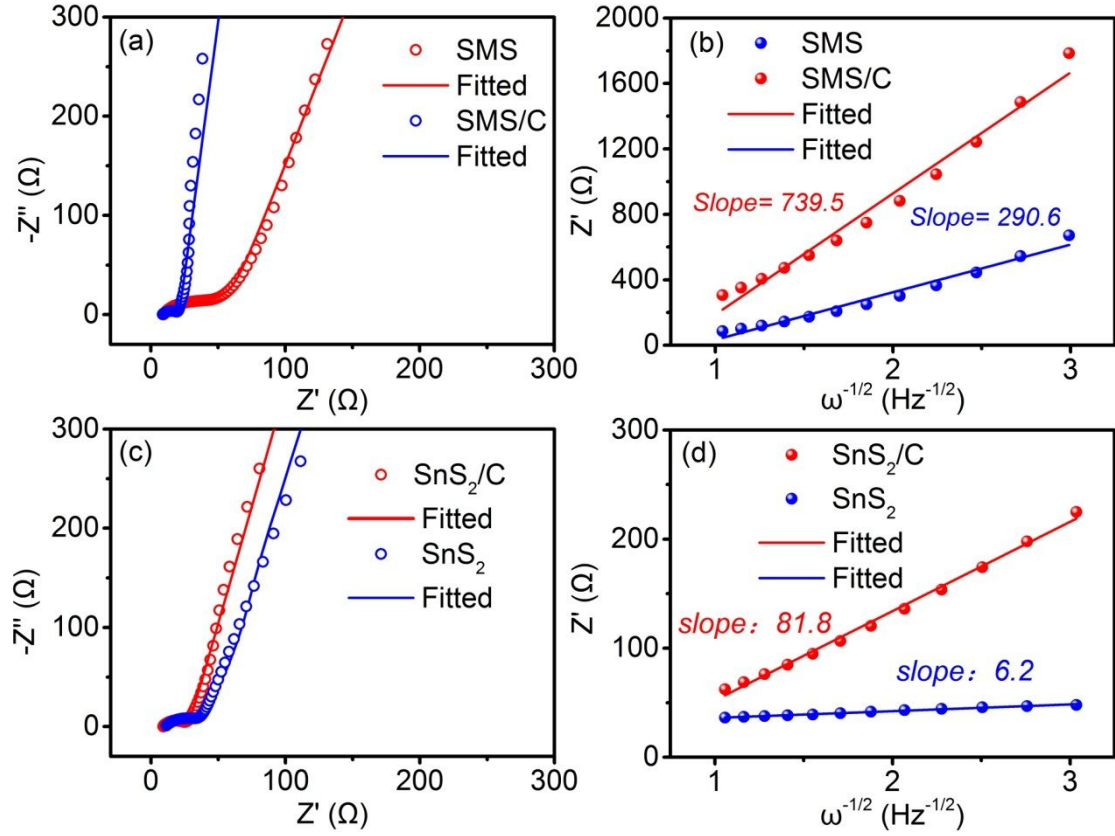

Figure S19. EIS measurement and the relationship plot of  $Z'$  versus  $\omega^{-1/2}$  at low-frequency region for SMS and SMS/C (a,b),  $\text{SnS}_2$  and  $\text{SnS}_2/\text{C}$  (c, d).

Equation S1:

$$D_{\text{Na}^+} = \frac{R^2 T^2}{2n^4 F^4 A^2 C^2 \sigma_w^2} \quad (\text{S1})$$

Equation S2:

$$Z' = R_\Omega + R_{\text{ct}} \sigma_w^{-1/2} \quad (\text{S2})$$

Where  $R$ ,  $T$ ,  $F$ ,  $n$ ,  $A$ ,  $C$  and  $\sigma_w$  are the gas constant, the absolute temperature, the surface area of the electrode, the Faraday's constant, the number of electrons per molecule during oxide, the insertion/extraction  $\text{Na}^+$  concentration in the anode material and the Warburg factor, respectively.

**Table S2.** Fitting result of EIS in Figure S20 with the equivalent circuit proposed.

| Samples             | $R_s(\Omega)$ | $R_{ct}(\Omega)$ | $\sigma (\Omega \text{ cm}^2 \text{ s}^{-1/2})$ | $D_{\text{Na}^+}(\text{cm}^2 \text{ s}^{-1})$ |
|---------------------|---------------|------------------|-------------------------------------------------|-----------------------------------------------|
| SMS                 | 8.731         | 56.26            | 739.5                                           | $9.28 \times 10^{-16}$                        |
| SMS/C               | 8.645         | 12.33            | 290.6                                           | $6.01 \times 10^{-15}$                        |
| SnS <sub>2</sub>    | 8.756         | 19.41            | 6.2                                             | $1.65 \times 10^{-17}$                        |
| SnS <sub>2</sub> /C | 10.7          | 27.21            | 81.8                                            | $2.87 \times 10^{-15}$                        |

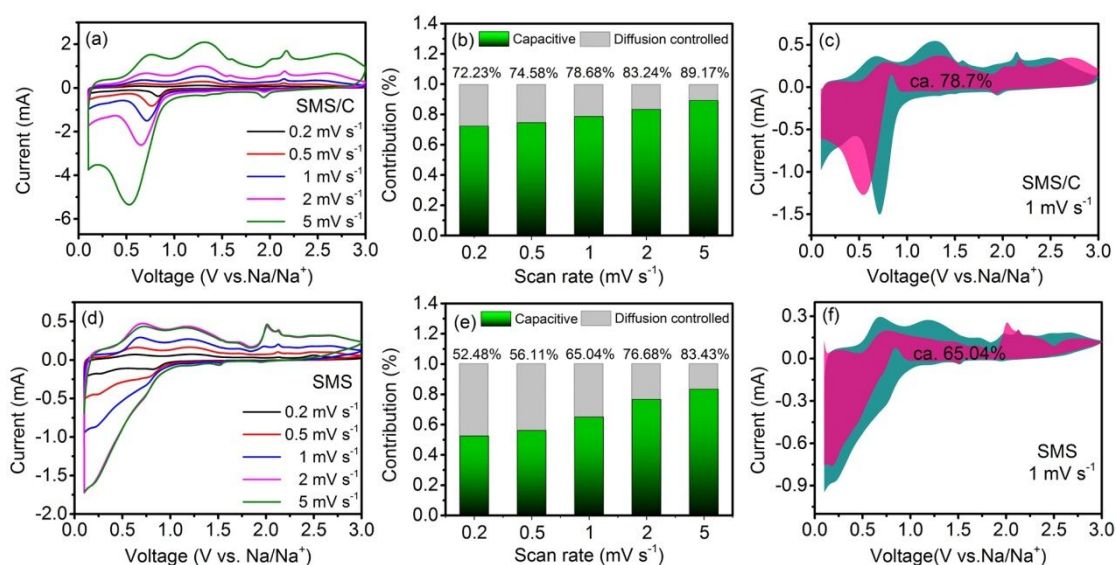

Figure S20. (a,c) The CV curves of SMS/C and SMS electrodes at different scan rates from 0.2 to 5 mV s<sup>-1</sup>. (b,d) The capacity contribution of SMS/C and SMS electrodes at different scan rates. (c,f) The capacity contribution of SMS/C and SMS at a specific scan rate of 1 mV s<sup>-1</sup>.



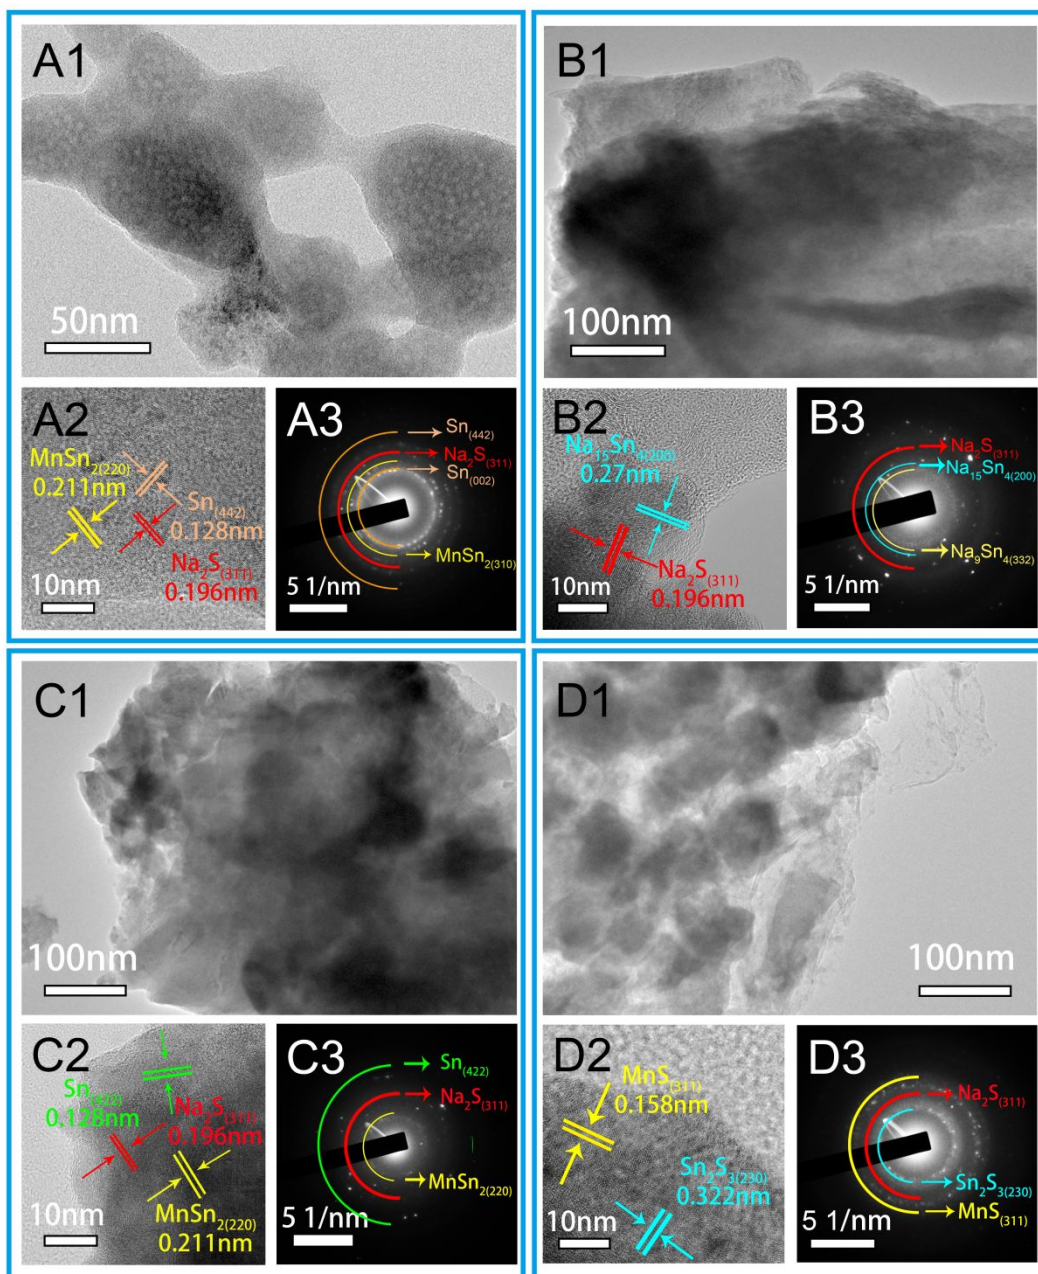

Figure S21. *Ex-situ* TEM results of SMS/C electrode at different charge-discharge states (A1-A3, 0.8 V; B1-B3, 0.1 V; C1-C3, 1.5 V; D1-D3, 3.0 V).



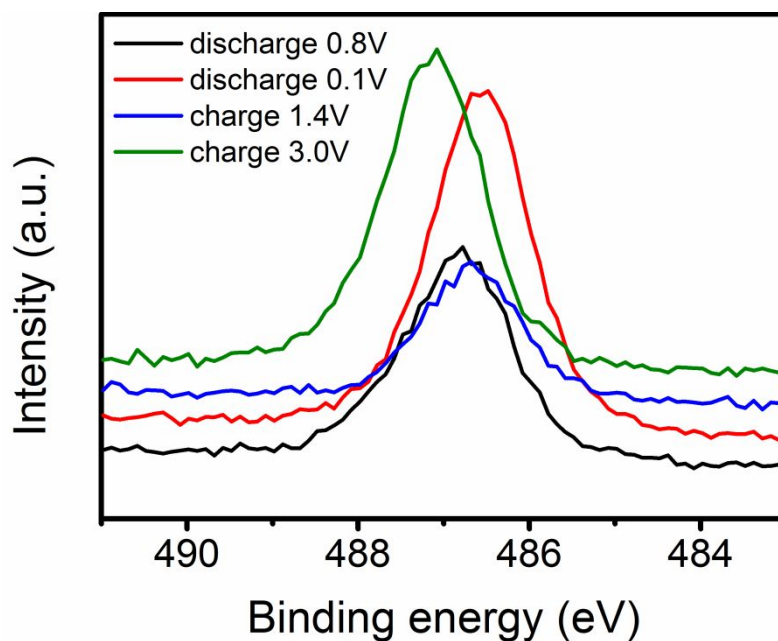

Figure S22. *Ex-situ* XPS measurement of SMS/C electrode at different charge-discharge states.

According to the *ex-situ* XPS results, the peak of Sn 3d<sub>5/2</sub> of SMS/C electrode shifts to lower binding position during the discharge process, indicating the reduction reaction from Sn<sup>4+</sup> to metallic Sn<sup>0</sup>. In the corresponding charge process, the peak of Sn 3d<sub>5/2</sub> return back to the high binding position, which closes to the pristine state, suggesting the highly reversibility for the conversion reaction from Sn<sup>0</sup> to Sn-S-Mn sulfide.

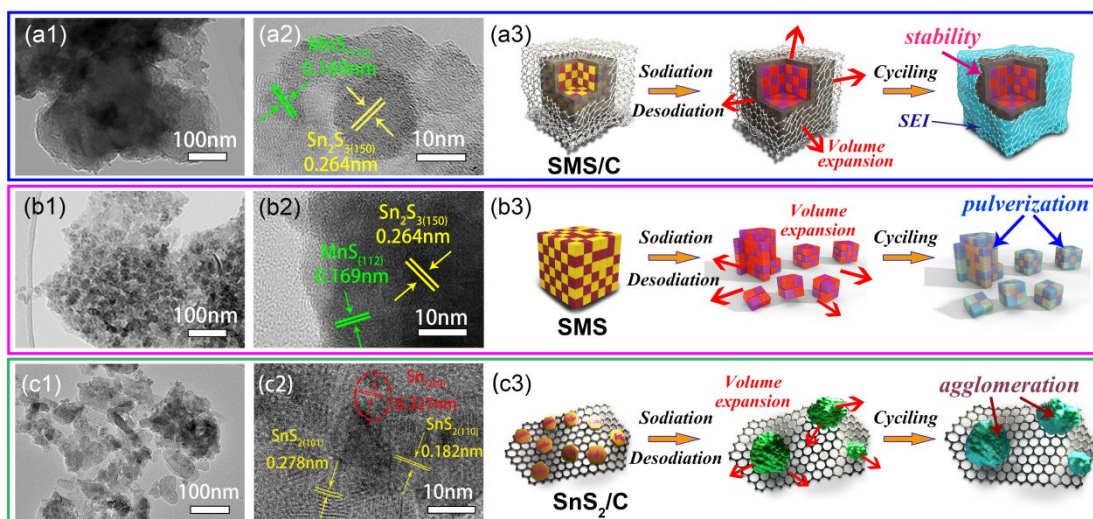

Figure S23. *Ex-situ* TEM and HRTEM images, and schematic illustration during long-term cycling for the (a) SMS/C, (b) pristine SMS and (c) SnS<sub>2</sub>/C electrodes after 100 cycles.

|                | SnS <sub>2</sub> @Mn <sub>2</sub> SnS <sub>4</sub> |          | SnS <sub>2</sub>                   |          |
|----------------|----------------------------------------------------|----------|------------------------------------|----------|
|                | Oh                                                 | Td       | Oh                                 | Td       |
| $E_{ads}$      | -2.69 eV                                           | -2.50 eV | -2.81 eV                           | -2.80 eV |
| $\Delta E/E_a$ | 0.19/0.25 eV (Oh $\rightarrow$ Td)                 |          | 0.01/0.16 eV (Oh $\rightarrow$ Td) |          |
| Side view      |                                                    |          |                                    |          |
| Top view       |                                                    |          |                                    |          |

Figure S24. Energetic result of Na<sup>+</sup> adsorption ( $E_{ads}$ ,  $\Delta E$  and  $E_a$ ) for SnS<sub>2</sub>@Mn<sub>2</sub>SnS<sub>4</sub> and pure SnS<sub>2</sub>. (Na<sup>+</sup>: large yellow sphere. Sn: grey sphere. S: small yellow sphere. Mn: purple sphere).

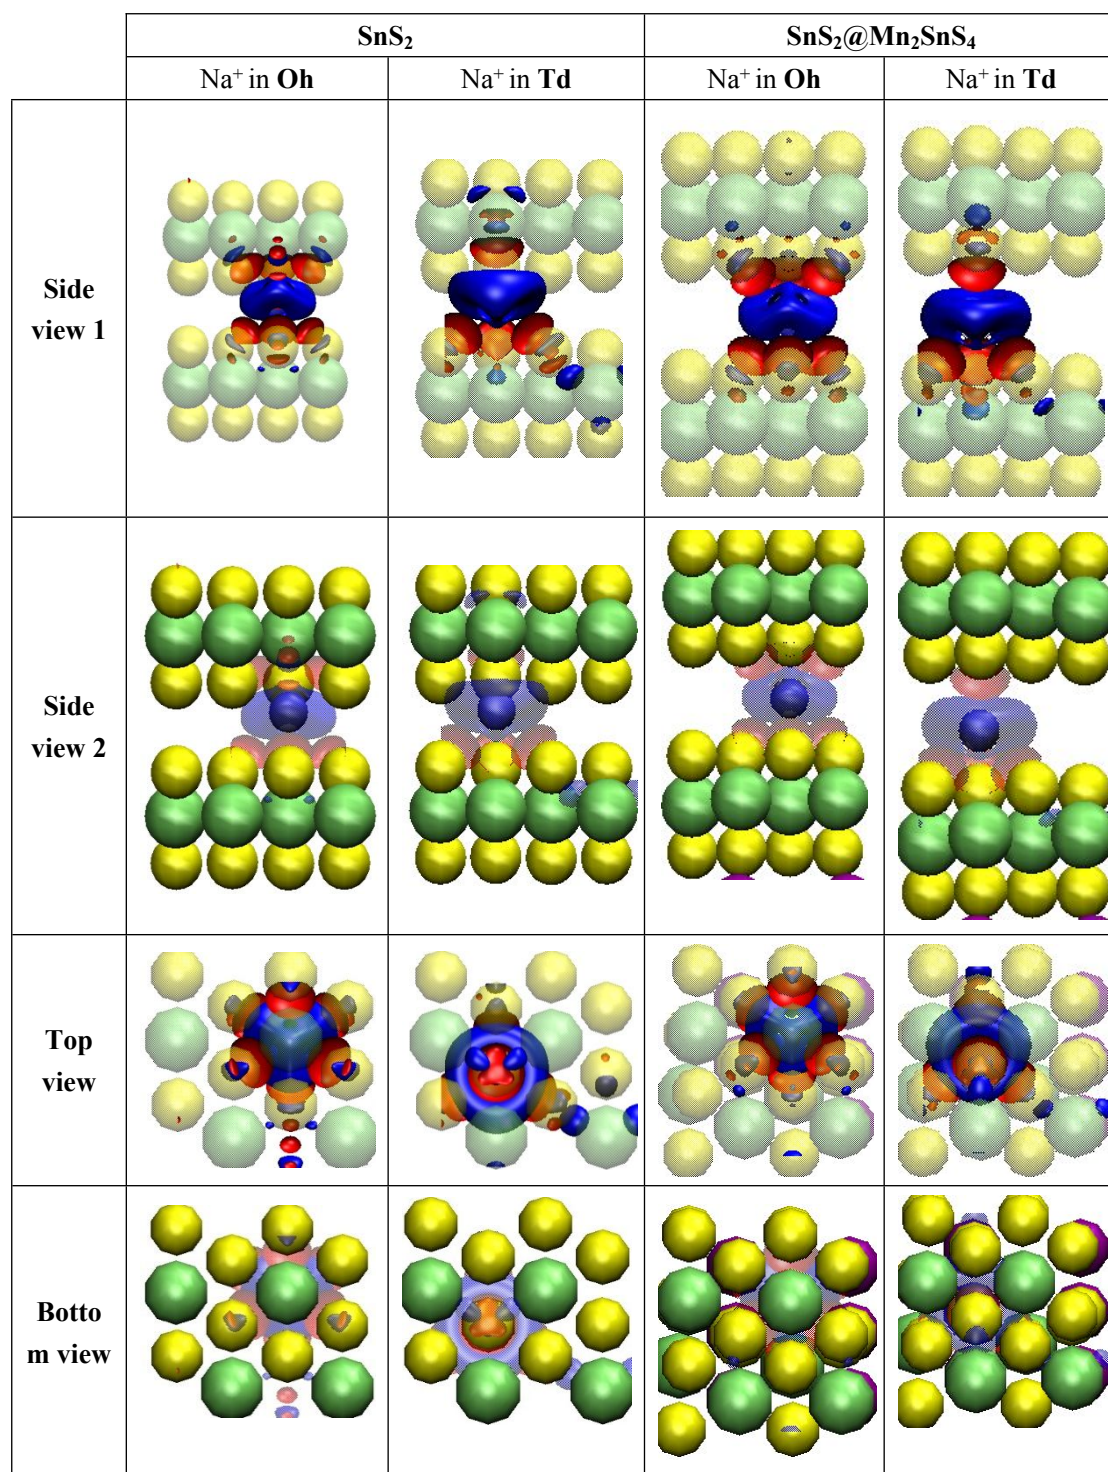

Figure S25. Charge density analysis of SnS<sub>2</sub>@Mn<sub>2</sub>SnS<sub>4</sub> and pure SnS<sub>2</sub>.

Both SnS<sub>2</sub> and Mn<sub>2</sub>SnS<sub>4</sub> shows similar charge density distribution that shows Na<sup>+</sup> with six bonds (each 3 in top and bottom) in Oh site and four bonds in Td site and explains the similar adsorption energies of them.



|           | SnS <sub>2</sub> @Mn <sub>2</sub> SnS <sub>4</sub> |          | SnS <sub>2</sub> |          |
|-----------|----------------------------------------------------|----------|------------------|----------|
|           | Oh                                                 | Td       | Oh               | Td       |
| $E_{ads}$ | -1.40 eV                                           | -1.66 eV | -2.21 eV         | -2.07 eV |
| Side view |                                                    |          |                  |          |

Figure S26. Na<sub>2</sub>S adsorption in the tunnel for SnS<sub>2</sub>@Mn<sub>2</sub>SnS<sub>4</sub> and pure SnS<sub>2</sub>.



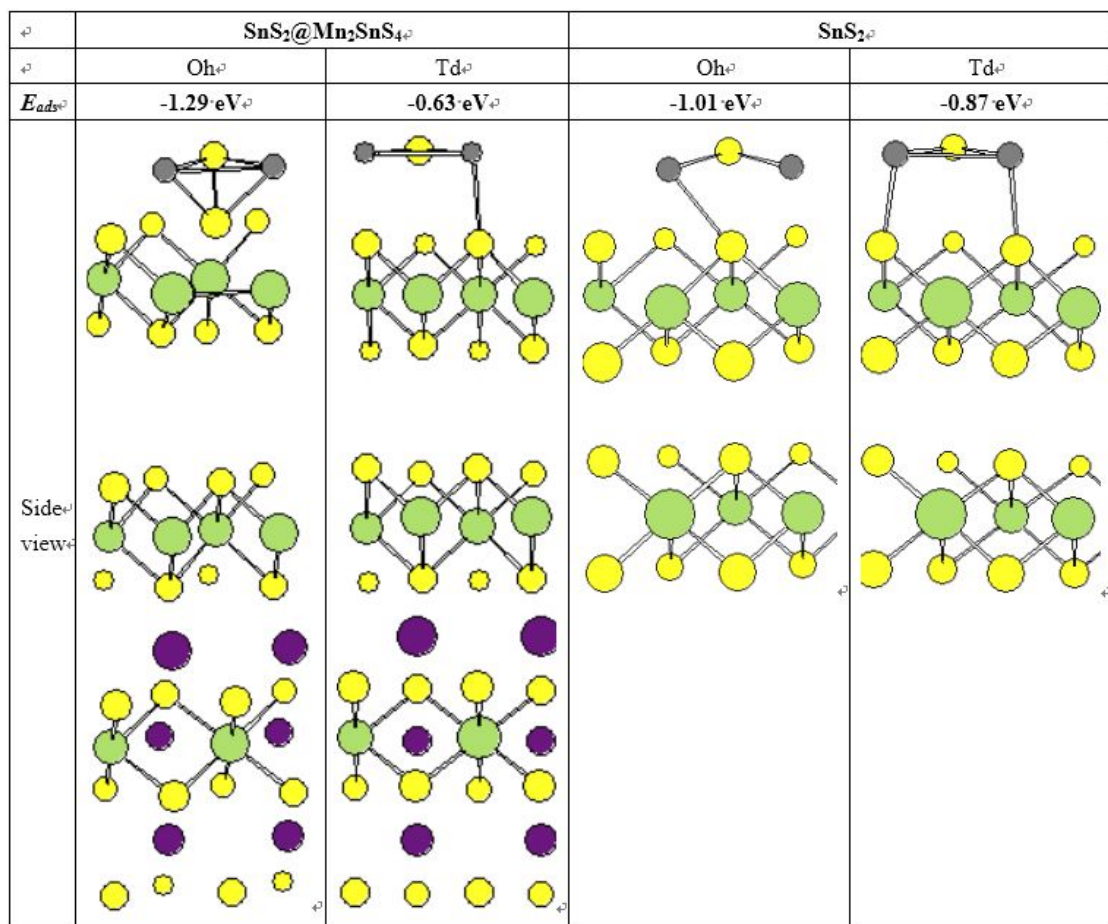

Figure S27.  $\text{Na}_2\text{S}$  adsorption on the surface for  $\text{SnS}_2@\text{Mn}_2\text{SnS}_4$  and pure  $\text{SnS}_2$ .

**Table S3.** Coordinate change for  $\text{Na}^+$  adsorption in the tunnel.

|                        | $\text{SnS}_2@\text{Mn}_2\text{SnS}_4$ |       | $\text{SnS}_2$ |       |
|------------------------|----------------------------------------|-------|----------------|-------|
|                        | Oh                                     | Td    | Oh             | Td    |
| Coordinate change in x | 0.01                                   | 0.01  | 0.01           | -0.01 |
| Coordinate change in y | -0.05                                  | -0.13 | 0.10           | 0.02  |
| Coordinate change in z | 0.55                                   | 0.58  | 3.77           | 1.55  |

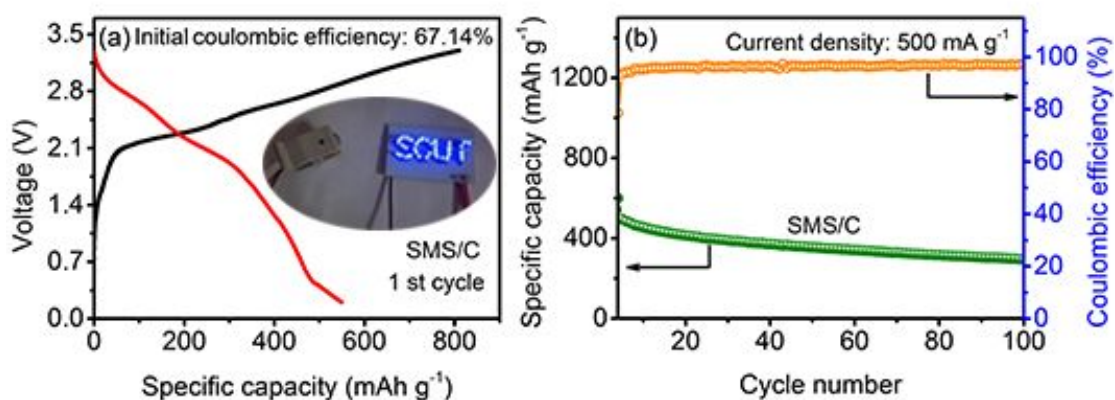

Figure S28. The full cell performances of SMS/C electrode. ( $\text{Na}_3\text{V}_2(\text{PO}_4)_3$  active material as counter electrode)

Based on the aforementioned results, the full cells with self-synthesized  $\text{Na}_3\text{V}_2(\text{PO}_4)_3$  (NVP) as the cathode were assembled, whose electrochemical property was presented in Figure S28a, further verifying the performance of SMS/C composite. The initial charge and discharge capacities are about 810.5 and 544.2 mAh g<sup>-1</sup>, respectively, with an initial coulombic efficiency of 67.14%. In addition, after 100 cycles at a current density of 500 mA g<sup>-1</sup>, the full cell of SMS/C can deliver a reverse capacity of 295 mAh g<sup>-1</sup>, as shown in Figure S28b. Compared with the excellent initial coulombic efficiency of SMS/C half cell, the initial coulombic efficiency of SMS/C full cell is relative lower, which may attribute to the irreversible electrochemical reactions. Moreover, the electrolyte of full cell is not matched well with the both cathode and anode, causing a relative higher consume of  $\text{Na}^+$  in formation of SEI on the both surface of anode and cathode.<sup>S11,S12</sup>

## Reference

- (S1) Fan, L.; Li, X.; Song, X.; Hu, N.; Xiong, D.; Koo, A.; Sun, X. Promising Dual-Doped Graphene Aerogel/SnS<sub>2</sub> Nanocrystal Building High Performance Sodium Ion Batteries. *ACS Appl. Mater. Interfaces* **2018**, *10*, 2637-2648.
- (S2) Tao, S.; Wu, D.; Chen, S.; Qian, B.; Chu, W.; Song, L. A Versatile Strategy for Ultrathin SnS<sub>2</sub> Nanosheets Confined in a N-Doped Graphene Sheet Composite for High Performance Lithium and Sodium-Ion Batteries. *Chem. Commun.* **2018**, *54*, 8379-8382.
- (S3) Qu, B.; Ma, C.; Ji, G.; Xu, C.; Xu, J.; Meng, Y. S.; Wang, T.; Lee, J. Y. Layered SnS<sub>2</sub>-Reduced Graphene Oxide Composite-a High-Capacity, High-Rate, and Long-Cycle Life Sodium-Ion Battery Anode Material. *Adv. mater.* **2014**, *26*, 3854-3859.
- (S4) Zhang, Y.; Zhu, P.; Huang, L.; Xie, J.; Zhang, S.; Cao, G.; Zhao, X. Few-Layered SnS<sub>2</sub> on Few-Layered Reduced Graphene Oxide as Na-Ion Battery Anode with Ultralong Cycle Life and Superior Rate Capability. *Adv. Funct. Mater.* **2015**, *25*, 481-489.
- (S5) Qin, J.; Zhao, N.; Shi, C.; Liu, E.; He, F.; Ma, L.; Li, Q.; Li, J.; He, C. Sandwiched C@SnO<sub>2</sub>@C Hollow Nanostructures as an Ultralong-Lifespan High-Rate Anode Material for Lithium-Ion and Sodium-Ion Batteries. *J. Mater. Chem. A* **2017**, *5*, 10946-10956.
- (S6) Jiang, Y.; Guo, Y.; Lu, W.; Feng, Z.; Xi, B.; Kai, S.; Zhang, J.; Feng, J.; Xiong, S. Rationally Incorporated MoS<sub>2</sub>/SnS<sub>2</sub> Nanoparticles on Graphene Sheets for Lithium-Ion and Sodium-Ion Batteries. *ACS Appl. Mater. interfaces* **2017**, *9*, 27697-27706.
- (S7) Wang, Y.; Zhou, J.; Wu, J.; Chen, F.; Li, P.; Han, N.; Huang, W.; Liu, Y.; Ye, H.;

Zhao, F.; Li, Y. Engineering SnS<sub>2</sub> Nanosheet Assemblies for Enhanced Electrochemical Lithium and Sodium Ion Storage. *J. Mater. Chem. A* **2017**, *5*, 25618-25624.

(S8) Liu, Y.; Yu, X.-Y.; Fang, Y.; Zhu, X.; Bao, J.; Zhou, X.; Lou, X. W. Confining SnS<sub>2</sub> Ultrathin Nanosheets in Hollow Carbon Nanostructures for Efficient Capacitive Sodium Storage. *Joule* **2018**, *2*, 1-11.

(S9) Wang, X.; Li, X.; Li, Q.; Li, H.; Xu, J.; Wang, H.; Zhao, G.; Lu, L.; Lin, X.; Li, H.; Li, S. Improved Electrochemical Performance Based on Nanostructured SnS<sub>2</sub>@CoS<sub>2</sub>-rGO Composite Anode for Sodium-Ion Batteries. *Nano-Micro Letters* **2018**, *10*, 46.

(S10) Zhou, P.; Wang, X.; Guan, W.; Zhang, D.; Fang, L.; Jiang, Y. SnS<sub>2</sub> Nanowall Arrays toward High-Performance Sodium Storage. *ACS Appl. Mater. interfaces* **2017**, *9*, 6979-6987.

(S11) Huang, Y.; Zheng, Y.; Li, X.; Adams, F.; Luo, W.; Huang, Y.; Hu, L. Electrode Materials of Sodium-Ion Batteries toward Practical Application. *ACS Energy Letters* **2018**, *3*, 1604-1612.

(S12) Ren, W.; Zhu, Z.; An, Q.; Mai, L. Emerging Prototype Sodium-Ion Full Cells with Nanostructured Electrode Materials. *Small* **2017**, *13*, 1604181.
